# Supplementary material for: New generation of Abbott enzyme assays: imprecision, methods comparison, and impact on patients’ results
Source: publisher site journal article supplement (doi:10.1515/cclm-2024-0627), 2024-07-10

**Supplemental Data .**

| Analyte | Unit | Passing-Bablok regression | Slope | | Intercept | |
| --- | --- | --- | --- | --- | --- | --- |
| Lower CI | Upper CI | Lower CI | Upper CI |
| ALP | U/L | ALP2 = 1.036 * ALP1 + 0.0714 | 1.030 | 1.040 | − 0.718 | 0.849 |
| GGT | U/L | GGT2 = 1.084 * GGT1 − 0.762 | 1.071 | 1.095 | − 1.132 | − 0.400 |
| LDH | U/L | LDH2 = 0.964 * LDH1 + 3.688 | 0.951 | 0.972 | 1.440 | 5.333 |

ALP: alkaline phosphatase; GGT: gamma-glutamyl transferase; LDH: lactate dehydrogenase; CI: confidence interval (95%).

**Supplemental Data 2.**

**A. B.**


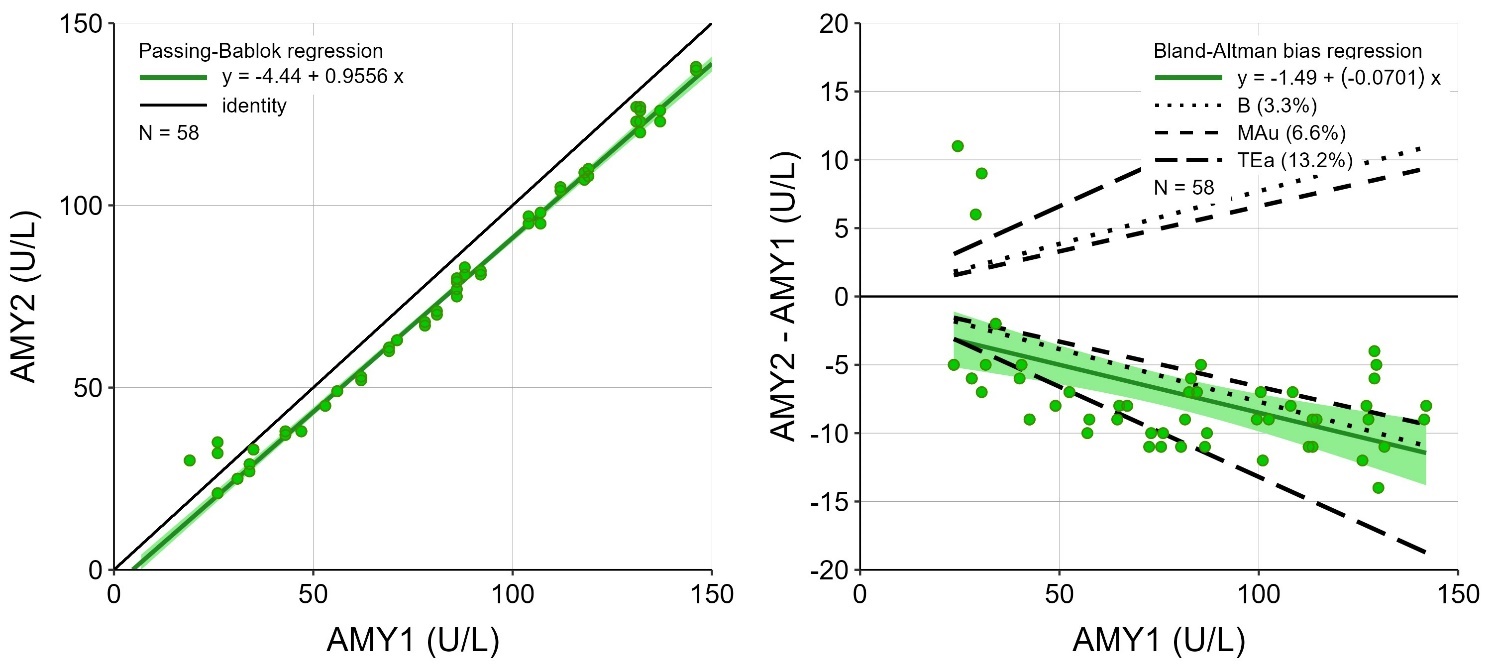

Supplement: Supplementary file 1 [file j_cclm-2024-0627_suppl_001.docx]
